# Supplementary material
Source: PubMed Central journal article supplement (PMC5908429)
Supplement: Supp_Fig1.pdf [file Supp_Fig1.pdf]

## Supplementary Data

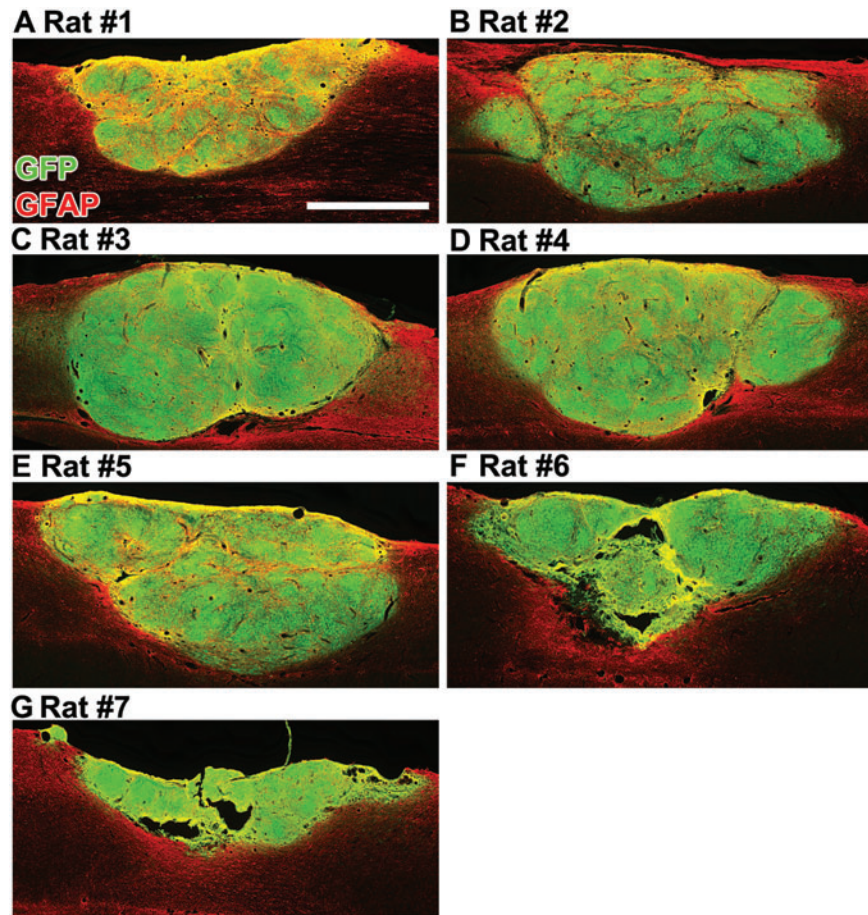

**SUPPLEMENTARY FIG. 1.** Neural progenitor cells (NPC) consistently fill contusion lesion cavities. (A–G) Representative photomicrographs from all animals in the NPC graft group assessed on the staircase task. Horizontal spinal cord sections immunolabeled for green fluorescent protein and glial fibrillary acidic protein. Scale bar: 1 mm.
